# Supplementary material
Source: PubMed Central journal article supplement (PMC9327701)
Supplement: jvi.00608-22-s0001.pdf [file jvi.00608-22-s0001.pdf]

## **Movie legends**

**Movie 1. Time-lapse microscopy of mock-infected MmBr-ACE2 cells.** MmBr-ACE2 cells were seeded at  $9 \times 10^4$  cells per quadrant in a  $\mu$ -Dish 35 mm Quad dish (Ibidi) and cultured in fresh media (2,5% FBS) containing propidium iodide the next day. Transmission and fluorescence images were taken every 15 min, up to 48 h, using a Nikon BioStation IMQ, at 37°C with three fields of acquisition for each condition.

**Movie 2. Time-lapse microscopy of MmBr-ACE2 cells infected with SARS-CoV-2.** MmBr-ACE2 cells were seeded at  $9 \times 10^4$  cells per quadrant in a  $\mu$ -Dish 35 mm Quad dish (Ibidi) and infected the next day with SARS-CoV-2 at a MOI of 1 in culture medium (2,5% FBS) containing propidium iodide. Transmission and fluorescence images were taken every 15 min, up to 48 h, using a Nikon BioStation IMQ, at 37°C with three fields of acquisition for each condition.

**Movie 3. Time-lapse microscopy of mock-infected FLG-ID-ACE2 cells.** FLG-ID cells were seeded at  $5.4 \times 10^4$  cells per quadrant in a  $\mu$ -Dish 35 mm Quad dish (Ibidi) and cultured in fresh media (2,5% FBS) containing propidium iodide the next day. Transmission and fluorescence images were taken every 15 min, up to 48 h, using a Nikon BioStation IMQ, at 37°C with three fields of acquisition for each condition.

**Movie 4. Time-lapse microscopy of FLG-ID-ACE2 cells infected with SARS-CoV-2.** FLG-ID cells were seeded at  $5.4 \times 10^4$  cells per quadrant in a  $\mu$ -Dish 35 mm Quad dish (Ibidi) and infected the next day with SARS-CoV-2 at a MOI of 1 in culture medium (2,5% FBS) containing propidium iodide. Transmission and fluorescence images were taken every 15 min, up to 48 h, using a Nikon BioStation IMQ, at 37°C with three fields of acquisition for each condition.
